# 1 DeepTetrad: high-throughput analysis of meiotic tetrads by deep 2 learning in plants

3

4 Eun-Cheon Lim<sup>1</sup>, Jaeil Kim<sup>1</sup>, Jihye Park<sup>1</sup>, Eun-Jung Kim<sup>1</sup>, Juhyun Kim<sup>1</sup>, Hyun Seob Cho<sup>1</sup>,  
5 Dohwan Byun<sup>1</sup>, Ian R Henderson<sup>2</sup>, Gregory P Copenhaver<sup>3</sup>, Ildoo Hwang<sup>1</sup> and Kyuha Choi<sup>1\*</sup>

6

7 <sup>1</sup>Department of Life Sciences, Pohang University of Science and Technology, Pohang,  
8 Gyeongbuk, Republic of Korea

9 <sup>2</sup>Department of Plant Sciences, University of Cambridge, Cambridge CB2 3EA, UK

10 <sup>3</sup>Department of Biology and the Integrative Program for Biological and Genome Sciences,  
11 University of North Carolina at Chapel Hill, Chapel Hill, North Carolina, USA.

12

13 \*Corresponding author: Kyuha Choi ([kyuha@postech.ac.kr](mailto:kyuha@postech.ac.kr))

14

## 15 Abstract

16 Meiotic crossovers facilitate chromosome segregation and create new combinations of alleles  
17 in gametes. Crossover frequency varies along chromosomes and crossover interference limits  
18 the coincidence of closely spaced crossovers. Crossovers can be measured by observing the  
19 inheritance of linked transgenes expressing different colors of fluorescent protein in  
20 *Arabidopsis* pollen tetrads. Here we establish DeepTetrad, a deep learning-based image  
21 recognition package for pollen tetrad analysis that enables high-throughput measurements of  
22 crossover frequency and interference in individual plants. DeepTetrad will accelerate genetic  
23 dissection of mechanisms that control meiotic recombination.

24

## 25 Main

26 Meiosis consists of two consecutive nuclear divisions and produces four haploid gametes from  
27 a single diploid cell in sexually reproducing eukaryotes<sup>1</sup>. In *Arabidopsis* male meiosis, ~200–

28 250 meiotic DNA double-strand breaks (DSBs) are induced in the genome by a DNA  
29 topoisomerase VI-like complex to initiate meiotic recombination<sup>2-4</sup>. Of these DSBs, only ~8–  
30 11 are repaired as crossovers (COs) using a homologous chromosome (homolog). Thus, male  
31 meiosis in the *Arabidopsis* genome, which comprises five chromosomes, results in an average  
32 of ~1.8 crossovers between homologs. This low number suggests the existence of  
33 mechanisms that limit crossovers, a phenomenon that is observed in most eukaryotes<sup>2</sup>.  
34 Meiotic DSB and CO frequencies are controlled by genetic and epigenetic factors and are  
35 non-randomly distributed along chromosomes, with higher levels around gene promoters and  
36 terminators and lower levels across the centromeres<sup>5-7</sup>.

37 At least two pathways (Type I and Type II), contribute to CO formation<sup>2,3</sup>. The Type I pathway  
38 leads to interfering COs that prevent the coincident occurrence of closely spaced CO on the  
39 same pair of chromosomes<sup>2,8,9</sup>. In plants, interfering COs represent ~80–85% of total COs and  
40 are dependent on the ZMM proteins (ZIP4, MSH4, MSH5, MER3, HEI10, SHOC1, PTD, MLH1,  
41 MLH3). The remaining ~10–15% of COs are non-interfering and occur via the Type II  
42 pathway<sup>10</sup>. Non-interfering COs are resolved by the MUS81 endonuclease and are restricted  
43 by anti-recombination factors such as FANCM, RECQ4A, RECQ4B, and FIGL1<sup>11-15</sup>.  
44 Disruption of anti-recombination factors can increase the number of Type II COs in plants,  
45 which has the potential to create new combinations of desirable alleles that can improve crop  
46 varieties<sup>13,16</sup>. Therefore, high-throughput detection and understanding of CO frequency and  
47 interference have important implications for our understanding of the control of meiotic  
48 recombination as well as for breeding.

49 In *Arabidopsis*, CO frequency and interference can be measured by pollen tetrad analysis  
50 using Fluorescent-Tagged Lines (FTLs) in the *quartet1* (*qrt1*) background<sup>17,18</sup>. Mutation of the  
51 *QRT1* gene encoding a pectin methylestrase results in the four pollen products of male  
52 meiosis remaining attached to one another, allowing classical tetrad analysis. Each FTL has  
53 a transgene that expresses eYFP (Y), dsRed (R) or eCFP (C) fluorescent proteins in mature  
54 pollen using the post-meiotic *LAT52* promoter. Genetic intervals bounded by transgenes  
55 expressing different colors (e.g. *I1bc*, *I1fg*, *I2ab*, *I2fg*, *I3bc*, *CEN3*, *I5ab*; Supplementary Fig.  
56 1) can be created by crossing FTLs. Scoring the segregation of 2 or 3 linked markers enables  
57 CO frequency and interference to be measured. For example, plants that are hemizygous for  
58 the three markers (*YRC/+++*) that define the *I1bc* interval produce 12 pollen tetrad classes  
59 (A–L) depending on the number of COs between *YR* and *RC* (Supplementary Fig. 2). The  
60 relative segregation of any two markers can be used to place pollen tetrads into one of the

61 three categories used for classic tetrad analysis: parental ditype (PD), tetratype (T) and non-  
62 parental ditype (NPD) (Supplementary Fig. 3). Tetrad analysis enables the calculation of map  
63 distances between pairs of markers, and measurement of CO interference between adjacent  
64 intervals.

65 Visual analysis of pollen tetrads is a powerful method for measuring genetic distance and  
66 crossover interference in *Arabidopsis*<sup>12,14,15,17,18</sup>. For example, manual analysis using  
67 fluorescence microscopy has been used to measure interference by comparing the map  
68 distances of two-color FTL intervals with and without COs in an adjacent interval<sup>18</sup>. However,  
69 manually scoring large numbers of tetrads is laborious and time consuming. Alternatively,  
70 FTLs in the *qrt1/+* or *QRT1* background can be analyzed by flow cytometry, which allows rapid  
71 measurement of CO frequency and interference of ~10,000 single pollen grains per plant<sup>19–21</sup>.  
72 Unfortunately, the flow cytometric method is unable to detect double crossovers within single  
73 intervals, requires high purity pollen samples, and uses specialized equipment for three-color  
74 measurements. As an alternative, we have developed DeepTetrad  
75 (<https://github.com/abysslover/deeptetrad>), a deep learning-based image recognition package  
76 that enables quick, high-throughput, automated pollen tetrad analysis that can be used with  
77 existing FTL lines.

78 To develop DeepTetrad, we adapted the Mask Regional Convolutional Neural Network (Mask  
79 R-CNN), integrating a deep residual network (ResNet) backbone for image recognition to  
80 detect four-pollen tetrads with and without fluorescence<sup>22,23</sup> (Fig. 1). First, DeepTetrad must  
81 precisely recognize pollen tetrads in bright-field pollen images, which include not only tetrads  
82 but also triads, dyads and monads (Fig. 1 a–c). DeepTetrad was assembled with two separate  
83 Mask R-CNN processes, using a ResNet-FPN backbone to generate masks of the bright-field  
84 pollen images (Fig. 1a)<sup>23,24</sup>. Then, DeepTetrad was trained to detect whole tetrad, triad, or  
85 dyad images via a Tetrad Segmentation Model with a ResNet depth of 101 layers. In parallel,  
86 we also trained DeepTetrad to detect every single pollen cell within tetrads, triads, dyads, and  
87 even monads via a Pollen Segmentation Model with a ResNet of depth 50 layers (Fig 1a). We  
88 used Keras and TensorFlow backends for training, with input bright-field images of pollen  
89 tetrads from FTLs<sup>25,26</sup>.

90 When trained, DeepTetrad can produce masks of both tetrad-like (tetrads, triads, dyads) and  
91 single pollen-like objects from bright-field images of pollen tetrads (Fig. 1b). Next, DeepTetrad  
92 assigns a centroid to each pollen mask. Based on the position and distance between centroids

93 of pollen masks within each tetrad-like mask, DeepTetrad recognizes measurable tetrads  
94 comprising four detectable pollen grains in the bright-field images (Fig. 1c). DeepTetrad's  
95 tetrad classifier then determines a tetrad type from a choice of 12 classes (A–L) for three-color  
96 assays (Supplementary Fig. 4), or from a choice of three types (PD, T, NPD) for two-color  
97 assays (Supplementary Fig. 5), according to the segregation pattern and intensity of  
98 fluorescence (yellow, red, cyan) in the four pollen masks per tetrad mask (Fig. 1d). CO  
99 frequency and interference can then be calculated using the frequency of tetrads in each  
100 class<sup>18</sup>. Because DeepTetrad is able to recognize single pollen grains and classify their  
101 fluorescence in tetrads, triads, dyads and monads, we developed the DeepMonad package  
102 by subclassing DeepTetrad. Like flow cytometry analysis, DeepMonad can measure crossover  
103 frequency and interference in FTLs by analyzing images of single fluorescent pollen grains in  
104 the *qrt1/+* and *QRT1* backgrounds<sup>19</sup>. In addition, DeepMonad can analyze single grains within  
105 tetrads, which allows comparison of genetic distances and interference calculated by  
106 DeepTetrad and DeepMonad (Fig. 2).

107 Since DeepTetrad does not require specialized equipment (like flow cytometry), we developed  
108 a quick, simple method to prepare a large number of pollen tetrads for high-throughput imaging  
109 (Fig. 2a). This method allows extensive image sets of pollen tetrads (bright-field, red, yellow  
110 and cyan) to be obtained, which can then be analyzed quickly and simultaneously by  
111 DeepTetrad (Supplementary Table 1). We used this technique to measure genetic distances  
112 in two-color FTL intervals (*CEN3*, *I1b*, *I1c*, *I1b-c*, *I1f*, *I1g*, *I1f-g*, *I2f*, *I2g*, *I2f-g*, *I3b*, *I3c*, *I3b-c*,  
113 *I5a*, *I5b*, *I5a-b*) using DeepTetrad (Fig. 2b, Supplementary Fig. 1). The genetic distance values  
114 obtained this way were similar to those obtained using manual tetrad counting, flow cytometry  
115 and DeepMonad (Fig. 2b, Supplementary Table 2-4). Intriguingly, our DeepTetrad analysis  
116 showed higher crossover frequencies for long intervals (*I1b*, *I1c*, *I1b-c*, *I3b-c*, *I5a*, *I5b*, *I5a-b*)  
117 compared to DeepMonad single pollen analysis; this was because DeepTetrad, but not  
118 DeepMonad, detects double crossovers in long intervals (Fig. 2b, Supplementary Table 2-4).  
119 In addition, the *CEN3* interval which spans the centromere on chromosome 3 had a lower CO  
120 rate (2.21 cM/Mb) than the overall male chromosome average CO frequencies (4.77 cM/Mb),  
121 and intervals *I2f*, *I2g* and *I2f-g* which are close to the telomere had higher CO frequencies  
122 (10.19 cM/Mb, 10.71 cM/Mb and 10.23 cM/Mb, respectively) (Fig. 2c, Supplementary Fig. 1),  
123 consistent with prior observations<sup>6,7,27</sup>. DeepTetrad can also recognize tetrad images taken at  
124 different magnifications, and produces consistent CO frequency irrespective of scale (Fig. 2d,  
125 Supplementary Fig. 6).

126 To demonstrate DeepTetrad's utility for measuring CO interference we analyzed tetrad images  
127 from the three-color (*YRC/+++*) FTL interval-*I1bc* (Fig. 2e, Supplementary Fig. 1). Previously,  
128 interference had been measured in manually counted tetrads by calculating the interference  
129 ratio (defined here as  $\sigma$ ) of the map distance of an interval (*i1*) in tetrads that have a CO in an  
130 adjacent interval (*i2*) with the map distance of the same interval (*i1*) in tetrads that lack a CO  
131 in *i2*<sup>18</sup>. Analysis of 18,584 tetrads with DeepTetrad resulted in a  $\sigma$  value of 0.33 for *I1bc* which  
132 is consistent with the  $\sigma$  value of 0.36 obtained by manually counting 923 tetrads (Fig. 2e,  
133 Supplementary Table 2-5). Flow cytometry has also been used to measure interference in  
134 fluorescent-tagged pollen monads by calculating the ratio of observed double COs to expected  
135 double COs ( $I=1$ -coefficient of coincidence, the ratio of  $DCO_{obs}$  to  $DCO_{exp}$ )<sup>19</sup>. An analysis of  
136 74,336 monads (converted from tetrad images) using this method with DeepTetrad resulted in  
137 an interference value of 0.54 for *I1bc* (*YRC/+++*) which was consistent with a value of 0.56  
138 obtained from flow sorting 135,789 monads (Fig. 2e)<sup>19</sup>. To provide baseline values for future  
139 studies we also used DeepTetrad and DeepMonad to measured  $\sigma$  and  $I$  values in 4 other 3-  
140 color FTL intervals (*I1fg*, *I2fg*, *I3bc* and *I5ab*; (Fig. 2e, Supplementary Table 2 and 3).  
141 Previously, it was shown that frequency of Type II COs increases in *fancm* single mutants, as  
142 well as *recq4a recq4b figl1* triple mutants, leading to an absence of interference ( $I=0$ ,  $\sigma$   
143  $=1$ )<sup>12,14,15,19</sup>. Using DeepTetrad, we found that the  $\sigma$  value of FTL-*I2ab* in *recq4a recq4b figl1*  
144 plants is 1, indicating no detectable interference, consistent with the prior observations (Fig.  
145 2f, Supplementary Table 2 and 3). Taken together, our data demonstrate that DeepTetrad is a  
146 useful deep learning-based image recognition package for high-throughput measurements of  
147 both CO frequency and interference.

148 The FTL-based visual tetrad assay has been used extensively in studies of plant meiosis<sup>12,17,18</sup>.  
149 The application of flow cytometry to FTLs allowed rapid, high-throughput measurement of CO  
150 frequency and interference<sup>19,21</sup>. Here, we have extended the utility of FTLs further by  
151 developing DeepTetrad to enable quick, simple, and automated tetrad analysis. DeepTetrad  
152 will accelerate genetic analysis of meiotic recombination mechanisms as well as the influence  
153 of epigenetic and environmental effects.

154

## 155 **Methods**

### 156 **DeepTetrad Network Architecture**

157 DeepTetrad assembles two separate Mask Regional Convolutional Neural Network (Mask R-  
158 CNN) for the instance segmentation task<sup>23</sup>. They generate masks of pollen objects and tetrad  
159 objects, respectively, from input bright-field images. As backbone architectures, which are  
160 responsible for feature detection, we used deep residual networks (ResNet) of depths 50 and  
161 101, with a feature pyramid network (FPN)<sup>28</sup>. We use the same terminology and definitions as  
162 those used in the Mask R-CNN article<sup>23</sup> when describing the backbone; ResNet-50-FPN.  
163 Multi-task loss  $L$  is also defined in the same manner.

$$164 \quad L = L_{cls} + L_{box} + L_{mask}$$

165 , where  $L_{cls}$  is classification loss.  $L_{box}$  is loss of bounding box  $v=(v_x, v_y, v_w, v_h)$ , which is a  
166 rectangle defined by coordinates of the upper-top vertex  $(x, y)$ , and the dimension (width  $w$ ,  
167 height  $h$ ).  $L_{mask}$  is mask loss. The  $i$ -th mask of bounding box  $v$ , which is the core feature in  
168 DeepTetrad, is a grayscale image defined by the following logical predicate.

$$169 \quad m_i(v) = \{(x_i, y_i) \mid pixel(x_i, y_i) > 0, v_x \leq x_i < v_x + v_w, v_y \leq y_i < v_y + v_h, i > 0\}$$

170 , in which the  $pixel(x, y)$  function returns the pixel value of given coordinates in an image.

171 Mask segmentation is a multi-label classification. Hence  $L_{mask}$  must be calculated  
172 independently for each class in a single image. It is achieved by applying a sigmoid function  
173 to each pixel, from which the mean of binary cross entropy loss is calculated.

$$174 \quad L_{mask} = -\sum_{i=1}^{C=2} y_i \log\left(\frac{1}{1 + e^{x_i}}\right)$$

175

## 176 Training

177 DeepTetrad is trained by nVidia TITAN X with 12 GB RAM using Keras<sup>26</sup> and Tensorflow<sup>25</sup>  
178 backends in the CUDA 10 platform. Transfer learning is performed with pre-trained weights  
179 on a Microsoft COCO dataset<sup>29</sup>. Input images are of fixed dimensions (1,920, 2,560). Zero-  
180 padding resizes each image to the exact dimension of (2,048, 2,560), which ensures that width  
181 and height are multiples of 512. The image is cropped at random positions with dimensions of  
182 (512, 512). For pollen objects, 919 training masks and 370 validation masks were used for

183 data augmentation. For tetrad objects, 1,371 training masks and 617 validation masks were  
184 used. Masks were annotated using VGG Image Annotator (VIA)<sup>30</sup>.

185 Image augmentation with scaling, translation, rotation, and shearing operations is randomly  
186 triggered to each training session and validation mini-batch. During an epoch, a mini-batch of  
187 two images per Graphic Processing Unit (GPU) is fed to the backbone. Regions of interest  
188 (ROIs) or bounding boxes are sampled 128 times for the pollen model; 512 times for the tetrad  
189 model.

190 The pollen model, in which ResNet-50-FPN backbone is integrated, is trained by a single GPU  
191 for 10,000 iterations using the Stochastic Gradient Descent (SGD) optimizer with a learning  
192 rate of 0.001, momentum of 0.9, and weight decay of 0.0001. The tetrad model is trained with  
193 the same configuration, except that the backbone is replaced with ResNet-101-FPN and the  
194 number of iterations is increased to 20,000.

195

## 196 **Inference**

197 Each backbone applies non-maximum suppression to 6,000 ROI candidates, in turn yielding  
198 1,000 ROIs. The number of detected masks is limited by the maximum number of detecting  
199 instances  $D$ , which is set to 200. Hence, only  $D$ -detected ROIs with the highest scores are  
200 selected to create masks. If  $D$  is increased, the model may fail to infer masks because of  
201 memory limitation, or the inference may be seriously prolonged. The model might also  
202 overlook a considerable number of masks, which would be a critical problem.

203 As a solution, DeepTetrad tries to infer masks from cropped images rather than directly  
204 gathering them from a whole image. In an image of dimension (2048, 2560), there are at least  
205 1,600–5,000 ground truth pollen masks, and at least 400–1,250 ground truth tetrad masks. As  
206 well as tetrad masks, monad, dyad, and triad masks will also be reported by the tetrad model.  
207 Thus, the number of ground truth masks in the whole image is much larger than  $D$  in both  
208 cases. A total of 63 cropped images of dimension (512, 512) are generated from the whole  
209 image, thereby left images of dimension (256, 512), or top images of dimension (512, 256)  
210 are intersected with one another. Complete inference for the whole image involves predicting  
211 masks from a mini-batch of 21 cropped images in three epochs.

212

## 213 **Mask refinement**

214 All masks from the inference stage need to be refined. Masks that are produced at the edges  
215 of the cropped image are usually not overlapping in local coordinates, which represent the  
216 spatial location before translating to that in the whole image. However, they can become  
217 broken or overlapping when translated to global coordinates, which are the coordinates in the  
218 whole image. After removing broken or overlapping masks, contours and the number of tetrad  
219 and pollen masks can be more accurately determined. The procedure is as follows: i) all pixel  
220 coordinates of pollen masks,  $M_p$ , and tetrad masks,  $M_t$  in each cropped image are moved to  
221 global coordinates by translation (affine transformation). ii) All pixel coordinates of tetrad  
222 masks are stored in a  $k$ -d tree,  $T_t$ . Similarly, all pollen masks are kept in a  $k$ -d tree,  $T_p$ . iii) All  
223 tetrad masks are queried against  $T_t$ , and, similarly, all pollen masks are queried against  $T_p$  to  
224 collect refined tetrad masks,  $\Psi_t$ , and refined pollen masks,  $\Psi_p$ , which meet the predicate below:

$$225 \quad \Psi_c(M_c) = \{m_i \mid \text{dist}(m_i, m_j) = 0, n(m_i) > n(m_j), i \neq j, m_i \in M_c, m_j \in M_c\}$$

226 , in which,  $\text{dist}(x, y)$  returns a Euclidean distance between  $x$  and  $y$ ,  $n(x)$  returns the number of  
227 elements, and  $c$  is either  $t$  (tetrad) or  $p$  (pollen).

228

229 The measurable tetrad masks and pollen masks,  $\Omega$ , are defined as follows:

$$230 \quad \Omega(\Psi_t, \Psi_p) = \{(\psi_i, \psi_j) \mid n(\psi_i \cap \text{centroid}(\psi_j)) = 4, \psi_i \in \Psi_t, \psi_j \in \Psi_p\}$$

231 , where  $\text{centroid}(x)$  yields the median of given mask coordinates.

232

233 Centroids are calculated to associate a tetrad mask  $\Psi_t$ , with the refined pollen masks  $\Psi_p$ . Each  
234 centroid of a pollen mask,  $\Psi_p$ , is queried against  $T_t$ , then  $\Psi_p$  is associated with a tetrad mask,  
235  $\Psi_t$  if the Euclidean distance between them is 0. When the number of  $\Psi_p$  associated with  $\Psi_t$  is  
236 four, they are deemed to be measurable.

237

## 238 **Tetrad classification**



239 A tetrad mask can be classified into a representative type of crossover event according to the  
240 fluorescence intensity values of associated pollen masks. The signal intensity,  $S_c$ , is defined  
241 as the mean of pixel values in each fluorescence channel of measurable pollen masks, in  
242 which  $c$  can be a fluorescence channel of red (R), yellow (Y), or cyan (C). We assume  $c=\{R,$   
243  $Y\}$  for two-channel images, and  $c=\{R, Y, C\}$  for three-channel images. For measurable tetrad  
244 masks,  $S_c$  of four pollen masks can be calculated, yet those which have undergone silencing  
245 in fluorescent protein expression should be ignored. If silencing occurs, the difference between  
246  $S_c$  of the second-highest and the third-highest would be smaller than a certain threshold,  $\Theta$ .  
247 Second-highest  $S_c$  represents presence or on-state of fluorescence proteins, whereas the  
248 third-highest implies absence or off-state of the proteins. Z-scores are calculated for four  $S_c$   
249 values before finding  $\Theta$ . We explored a parameter space of  $\Theta$  up to two decimal places using  
250 an adaptive grid search method, then  $\Theta$  was set to 0.40, meaning that  $S_c$  differences between  
251 on-state and off-state must be bigger than but not equal to 0.40 in a normal distribution.

252 We determine if fluorescent proteins in a pollen grain are expressed by comparing individual  
253  $S_c$  with the median of all four  $S_c$  values. With per-channel expressions, tetrad masks are  
254 classified as one of classical three tetrad types: parental ditype (PD), tetra type (T), and non-  
255 parental ditype (NPD), with two-color FTL intervals or 12 classes (A to L) with the three-color  
256 counterparts (Supplementary Fig. 2 and 3). In three-color FTL intervals that have two intervals  
257 ( $i1$  and  $i2$ ) with four chromatids (1-4), tetrad classes are non-crossover (A), single crossover  
258 interval 1 (B; SCO- $i1$ ), single crossover interval 2 (C; SCO- $i2$ ), two strand double crossover  
259 (D; 2stDCO), three strand double crossover a (E; 3st DCOa), three strand double crossover b  
260 (F; 3st DCOb), four strand double crossover (G; 4st DCO), non-parental ditype interval 1, non-  
261 crossover interval 2 (H; NPD- $i1$  NCO- $i2$ ), non-crossover interval 1, non-parental ditype interval  
262 2 (I; NCO- $i1$  NPD- $i2$ ), non-parental ditype interval 1, single crossover interval 2 (J; NPD- $i1$   
263 SCO- $i2$ ), single crossover interval 1, non-parental ditype interval 2 (K; SCO- $i1$  NPD- $i2$ ) and  
264 non-parental ditype interval 1, non-parental ditype interval 2 (L; NPD- $i1$  NPD- $i2$ )<sup>18</sup>.

265

## 266 **Calculation of interference**

267 With two-color FTL intervals, we calculate crossover frequency following Perkin's equation:

$$268 \quad cM = \frac{0.5T + 3NPD}{(PD + T + NPD)} * 100$$

269 With three-color FTL intervals, we can calculate the interference ratio  $\sigma$ , which is the ratio of  
270 the map distance with adjacent crossover  $\chi_\gamma$  to the map distance without adjacent crossover  
271  $\chi_\delta$ .

$$272 \quad \chi_\gamma = \frac{0.5T_\gamma + 3NPD_\gamma}{PD_\gamma + T_\gamma + NPD_\gamma} = \frac{0.5(D + E + F + G + K) + 3(J + L)}{(C + I) + (D + E + F + G + K) + (J + L)}$$

$$273 \quad \chi_\delta = \frac{0.5T_\delta + 3NPD_\delta}{PD_\delta + T_\delta + NPD_\delta} = \frac{0.5(B) + 3(H)}{(A) + (B) + (H)}$$

$$274 \quad \sigma = \frac{\chi_\gamma}{\chi_\delta}$$

275 , in which PD means the number of parental ditypes or no crossover event. T is the number of  
276 tetratype or single crossover events. NPD is the number of non-parental ditype or double  
277 crossover events. A-L letters represent 12 tetrad classes from three-color FTLs  
278 (Supplementary Fig. 2)<sup>18</sup>.

279 In the above equations, we assumed that two adjacent genetic intervals of  $i1$  and  $i2$  are defined  
280 by three separate fluorescent protein transgenes of red, yellow, and cyan in sequential order.  
281 The  $\gamma$  represents that at least a single crossover event occurred at  $i2$ , meanwhile  $\delta$  denotes  
282 that no crossover events were found at  $i2$ . We highlight that the number of crossover event is  
283 counted at  $i1$ .  $T_\gamma$  is the tetratype tetrads for  $i1$  that have a CO in  $i2$ , and  $T_\delta$  is the tetratype  
284 tetrads for  $i1$  that do not have a CO in  $i2$ . DeepTetrad maps the order of input color images  
285 (red-yellow-cyan) to the physical order of fluorescent protein transgenes of FTLs for  
286 calculating the interference ratio as well as genetic distance.

287

## 288 **Pollen tetrad preparation**

289 FTL plants were grown at 20°C under long-day condition (16 h light/8 h dark). Twenty open  
290 flowers of a primary shoot from 30-day old FTL plants were collected in a 1.5-ml tube, and  
291 1 ml of pollen tetrad preparation solution (17% sucrose, 2 mM CaCl<sub>2</sub>, 1.625 mM boric acid,  
292 0.1% Triton-X-100, pH 7.5) was added before incubating for 5 min at room temperature, with  
293 gentle rotation. Flowers and the solution were mixed by inverting the tube several times. The  
294 solution of pollen tetrads was pipetted and filtered into a new 1.5-ml tube through an 80- $\mu$ m

295 nylon mesh (30 x 30 mm). The filtered solution was centrifuged at 500g for 3 min to make a  
296 yellow pellet. The supernatant was removed and discarded by pipetting or vacuum aspiration.  
297 Four  $\mu$ l of pollen tetrad preparation solution was added to the yellow pellet. After pipetting  
298 gently five times, the 4- $\mu$ l suspension of pollen tetrads was loaded on a glass microscope slide  
299 and covered with a small cover glass (9 x 9 mm). This resulted in ~2,500 tetrads for imaging.

300

### 301 **Microscopy and imaging**

302 A set of four photographs for each pollen tetrad was taken using a Leica M165 FC dissecting  
303 stereomicroscope with bright-field, RFP, YFP and CFP filters (ArticleNo 10450224, 10447410,  
304 10447409, respectively) in sequential order. Twelve image sets per cover glass were obtained  
305 from ~20 flowers when a magnification of 50x was used to image tetrads. Information about  
306 the gain, gamma, saturation and exposure for each FTL for high quality imaging is available  
307 (Supplementary Table 6).

308

### 309 **Acknowledgements**

310 We thank Raphael Mercier (MPI, Germany) for providing *recq4 figl1* mutant seeds. We thank  
311 our colleagues for giving critical comments. This work is funded by the Suh Kyungbae  
312 Foundation, Republic of Korea, Next-Generation BioGreen 21 Program (PJ01337001), Rural  
313 Development Administration, Republic of Korea, and Basic Science Research Program  
314 through the National Research Foundation of Korea (NRF) funded by the Ministry of Education  
315 (2017R1D1AB03028374). GPC is supported by a US National Science Foundation grant  
316 (IOS-1844264).

317

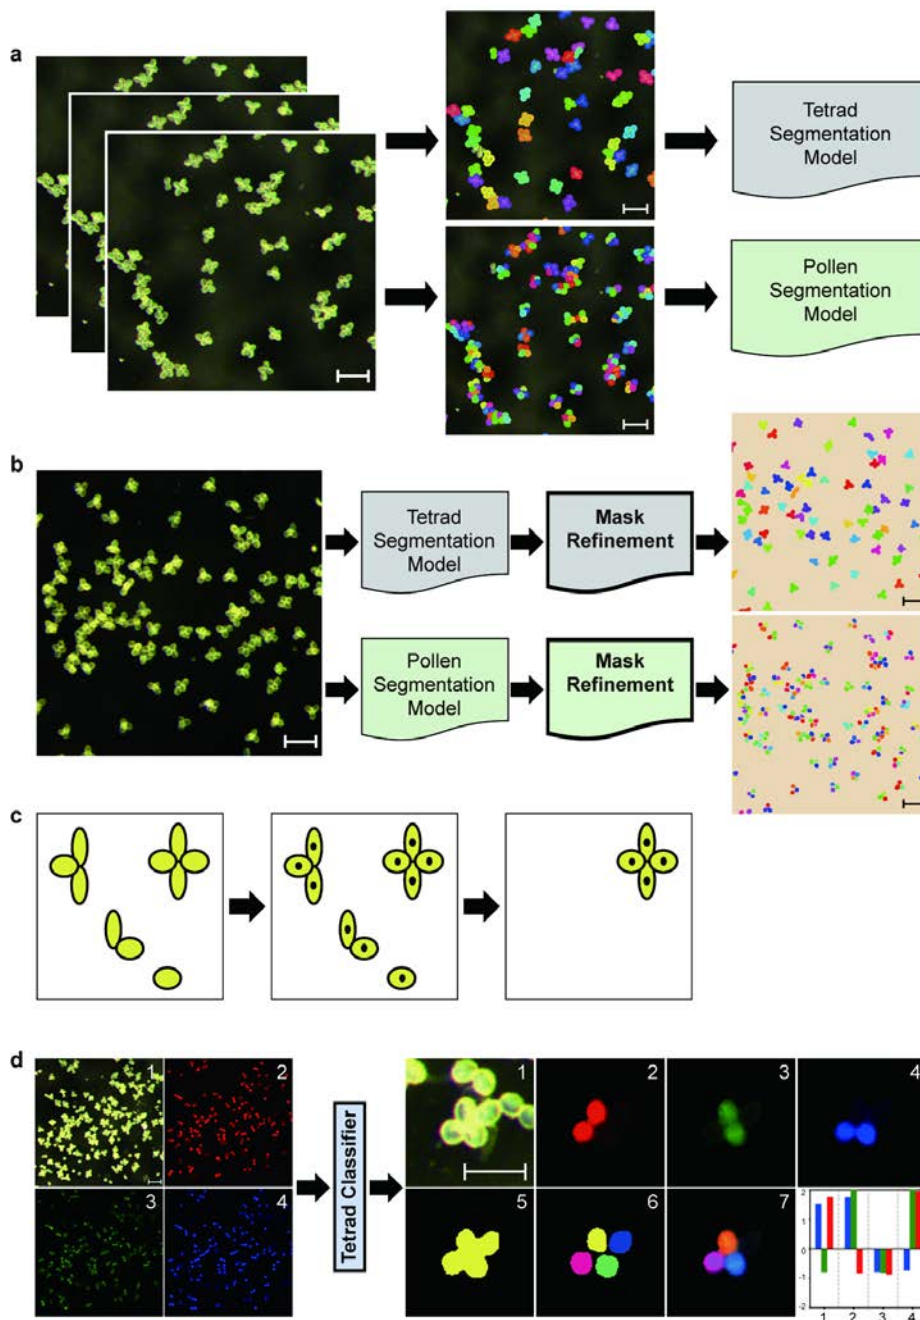

318

319 **Fig. 1. Establishment of DeepTetrad.**

320 **a**, Masking and training of tetrad-like and pollen images by DeepTetrad. Two separate DeepTetrad  
 321 segmentation models make masks of tetrad-like and single pollens, respectively. **b**, Generation of  
 322 masks from tetrad-like and single pollen images by DeepTetrad. **c**, Recognition and selection of  
 323 measurable tetrad masks by DeepTetrad. Black dots represent the centroid assigned to each pollen  
 324 mask in monads, dyads, triads, and tetrads. **d**, Tetrad classification by DeepTetrad. Bright-field (1), red  
 325 (2), yellow (3), cyan (4)-filtered tetrad images, tetrad mask (5), single-pollen masks (6), three-color  
 326 merged tetrads (7) and DeepTetrad output are displayed. In the bar graphs of DeepTetrad output, X  
 327 axis labels indicate four pollens per tetrad and Y axis labels show the intensities of three-color  
 328 fluorescence in the tetrad image. Scale bar = 0.1 mm (a, b, d, left), 0.05 mm (d, right). The colors in the  
 329 tetrad mask images (a, middle panel, b, right panel, d, (6)) do not correspond to fluorescence colors.

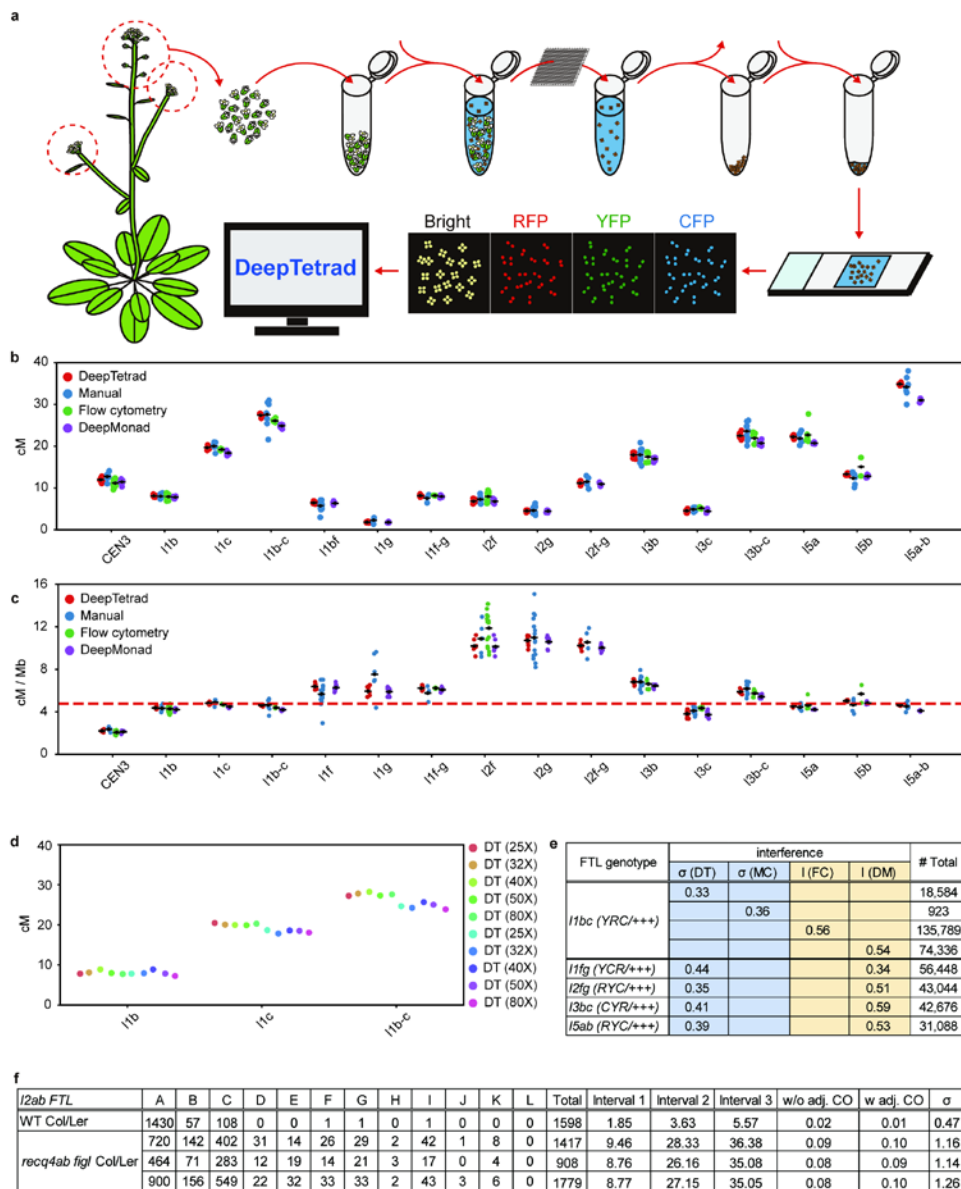

330

331

**Fig. 2. Measurements of crossover frequency and interference by DeepTetrad.**

332

**a**, A quick tetrad preparation method for high-throughput imaging of tetrads. The detail procedure was described in Methods. **b**, Plot showing measurement of CO frequencies (cM) in single intervals of FTLs. Genetic distances of single intervals were measured by DeepTetrad, manual counting, flow cytometry and DeepMonad. **c**, Plot showing measurement of CO frequencies (cM/Mb) in single intervals of FTLs. A horizontal red line indicates the male chromosome average crossover rate. **d**, Plot showing measurement of genetic distances in various sized tetrad images by DeepTetrad. Different magnifications were applied to the same tetrad samples for imaging (Supplementary Fig. 6). **e**, Measurement of CO interference by DeepTetrad. The CO interference ratio ( $\sigma = X_{ij}$  without adjacent CO /  $X_{ij}$  with adjacent CO) was measured by DeepTetrad (DT) and manual counting (MC), highlighted in blue. Interference value ( $I = 1 - \text{coefficient of coincidence}$ ) in yellow, was calculated by flow cytometry (FC) and DeepMonad (DM). A value of 1 and 0 indicates no interference in  $\sigma$  and  $I$ , respectively. The values of interference in other FTLs were measured by DeepTetrad and DeepMonad. **f**, The CO interference ratio in *recq4a recq4b fig1* plants. DeepTetrad shows that *recq4a recq4b fig1* causes interference to be absent, increasing crossover frequency in FTL-*I2ab*.

345

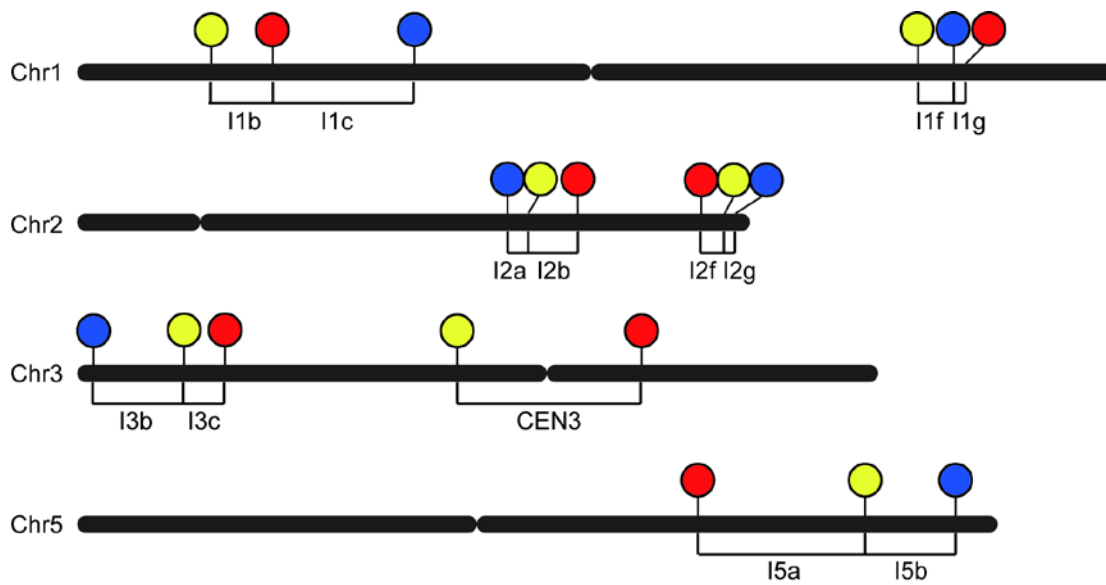

346

347 **Supplementary Fig. 1. T-DNA locations of pollen FTLs (*I1bc*, *I1fg*, *I2ab*, *I2fg*, *I3bc*, *CEN3*,**  
348 ***I5ab*) on the *Arabidopsis thaliana* genome.**

349 T-DNA positions of FTLs originally generated in *qrt1* Col-0 plants are displayed on the  
350 *Arabidopsis* genome. Each FTL of homozygous genotype for fluorescence T-DNAs was  
351 crossed to *qrt1*, and pollen tetrads of F<sub>1</sub> plants were used to measure CO frequency and  
352 interference by DeepTetrad. Chr = chromosome.

353

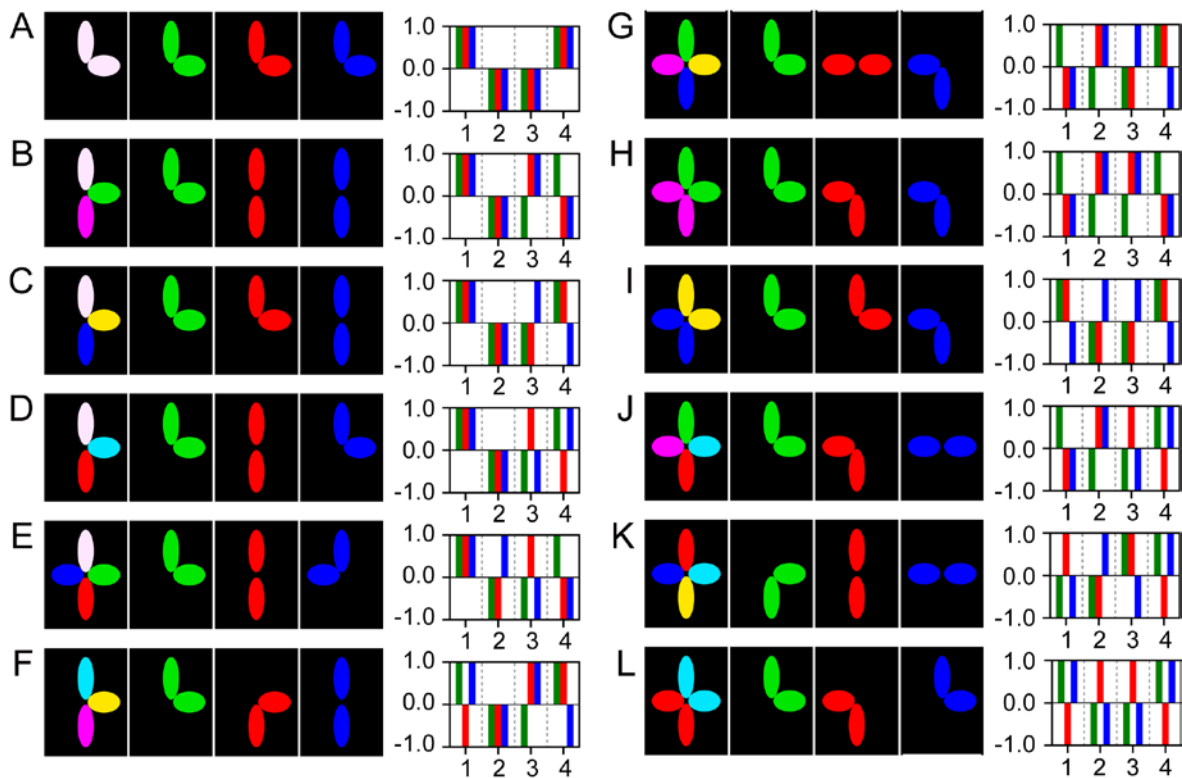

354

355 **Supplementary Fig. 2. Diagram of 12 tetrad classes (A-L) generated by three-color**  
356 **tetrad assay and DeepTetrad outputs.**

357 Twelve tetrad classes (A-L) are generated from three-color tetrad assays<sup>18</sup>. According to the  
358 position and segregation of three T-DNAs expressing eYFP, dsRed and eCFP, non-crossover  
359 (A) and recombination tetrad classes (B-L) are determined in FTLs (*YRC/+++*). For each  
360 tetrad type, merged, red, yellow and cyan images are displayed. Bar graphs indicate the output  
361 of DeepTetrad classification. In the bar graphs, X axis labels indicate four spores (1, 2, 3, 4)  
362 per tetrad and Y axis labels show the intensities of three-color fluorescence in the tetrad  
363 images.

364

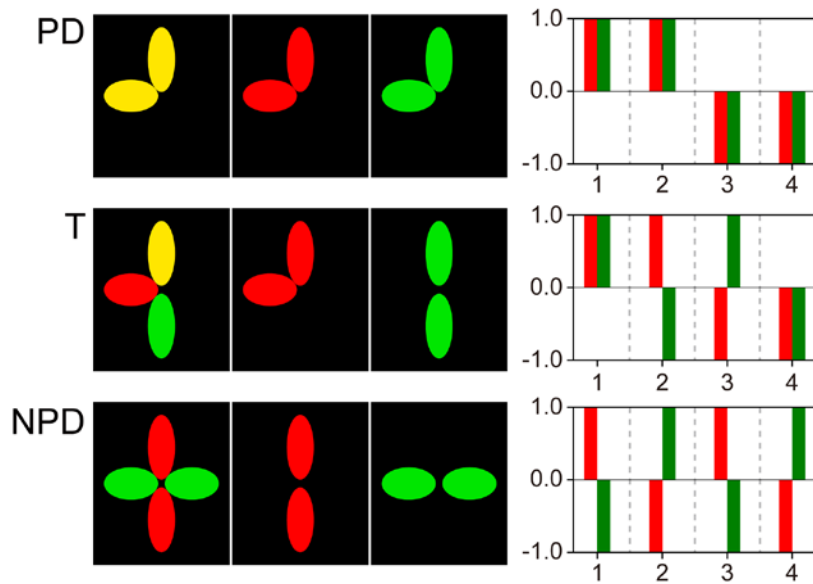

365

366 **Supplementary Fig. 3. Diagram for three tetrad classes (PD, T, NPD) of 2-color assay**  
367 **and DeepTetrad output.**

368 Tetrad classes of **PD** (parental ditype), **T** (tetra type), and **NPD** (non-parental ditype) are  
369 generated from two-color tetrad assays of FTLs (*RY/++*). In the bar graphs, X axis labels  
370 indicate four pollens per tetrad and Y axis labels show the intensities of two-color fluorescence  
371 in the tetrad images.

372



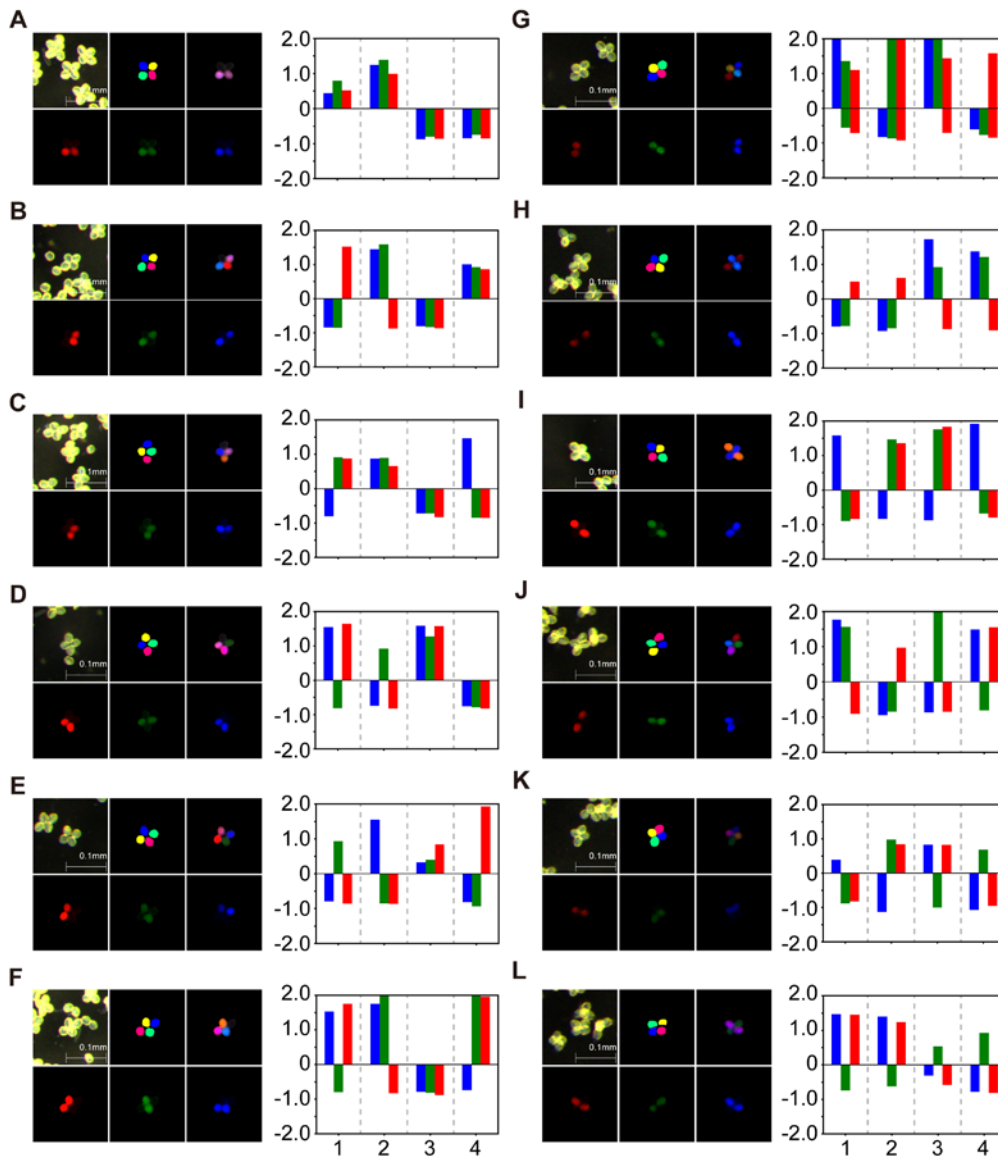

373

374 **Supplementary Fig. 4. Tetrad images and DeepTetrad output in three-color assay of FTL**  
375 **plants.**

376 DeepTetrad recognizes measurable tetrads from a large number of tetrads, and classifies the  
377 tetrads as **A** (non-crossover, NCO) or **B–L** (recombinant tetrad classes with one or two  
378 crossovers in interval 1 and 2 (*i1* and *i2*)) of FTL (*RYC/++*). Tetrad classes are **B**, single  
379 crossover interval 1 *SCO-i1*, **C**, *SCO-i2*, **D**, two strand double crossover 2st DCO, **E**, 3st DCOa,  
380 **F**, 3st DCOb, **G**, 4st DCO, **H**, *NPD-i1* *NCO-i2*, **I**, *NCO-i1* *NPD-i2*, **J**, *NPD-i1* *SCO-i2*, **K**, *SCO-*  
381 *i1* *NPD-i2*, and **L**, *NPD-i1* *NPD-i2*<sup>18</sup>. Each panel (A-L) shows bright-field (upper left), single-  
382 pollen mask (upper middle), merged-fluorescent (upper right), and single-color fluorescent  
383 (lower three) images. The colors in the tetrad mask images do not correspond to fluorescence  
384 colors. In the bar graphs, X axis labels indicate four pollens per tetrad and Y axis labels show  
385 the intensities of three-color fluorescence in the tetrad images. Scale bar = 0.1 mm.

386

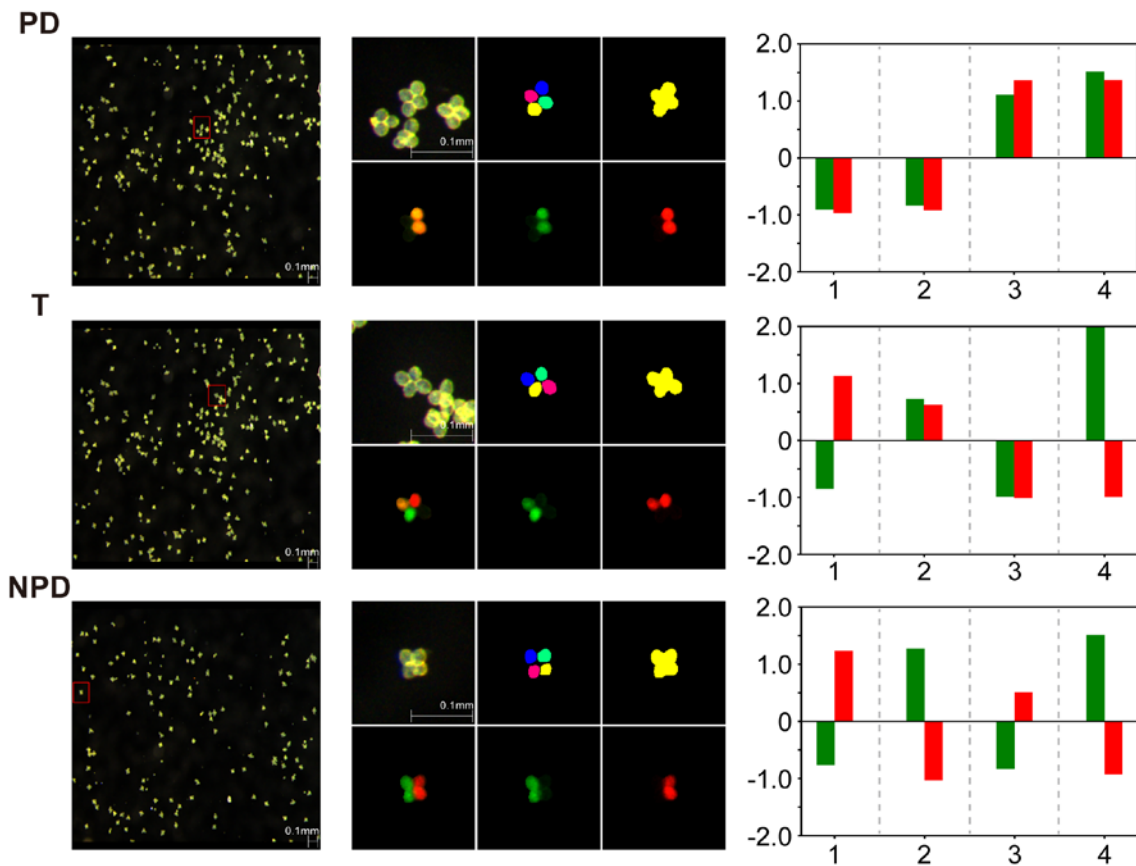

**Supplementary Fig. 5. Tetrad images and DeepTetrad output in two-color assay of FTL-*CEN3* (*YR/++*) plants.**

DeepTetrad recognizes measurable tetrads (left panels) and classifies them as **PD** (parental ditype), **T** (tetra type) and **NPD** (non-parental ditype) of tetrad types according to segregation of fluorescence in FTL-*CEN3* (*YR/++*) (middle panels). Each panel in the middle shows bright-field (upper left), single-pollen mask (upper middle), tetrad mask (upper right), merged-fluorescent (lower left), yellow (lower middle) and red (lower right) fluorescent images. The colors in the tetrad mask images do not correspond to fluorescence colors. In the bar graphs, X axis labels indicate four pollens per tetrad and Y axis labels show the intensities of two-color fluorescence in the tetrad images. Scale bar = 0.1 mm.

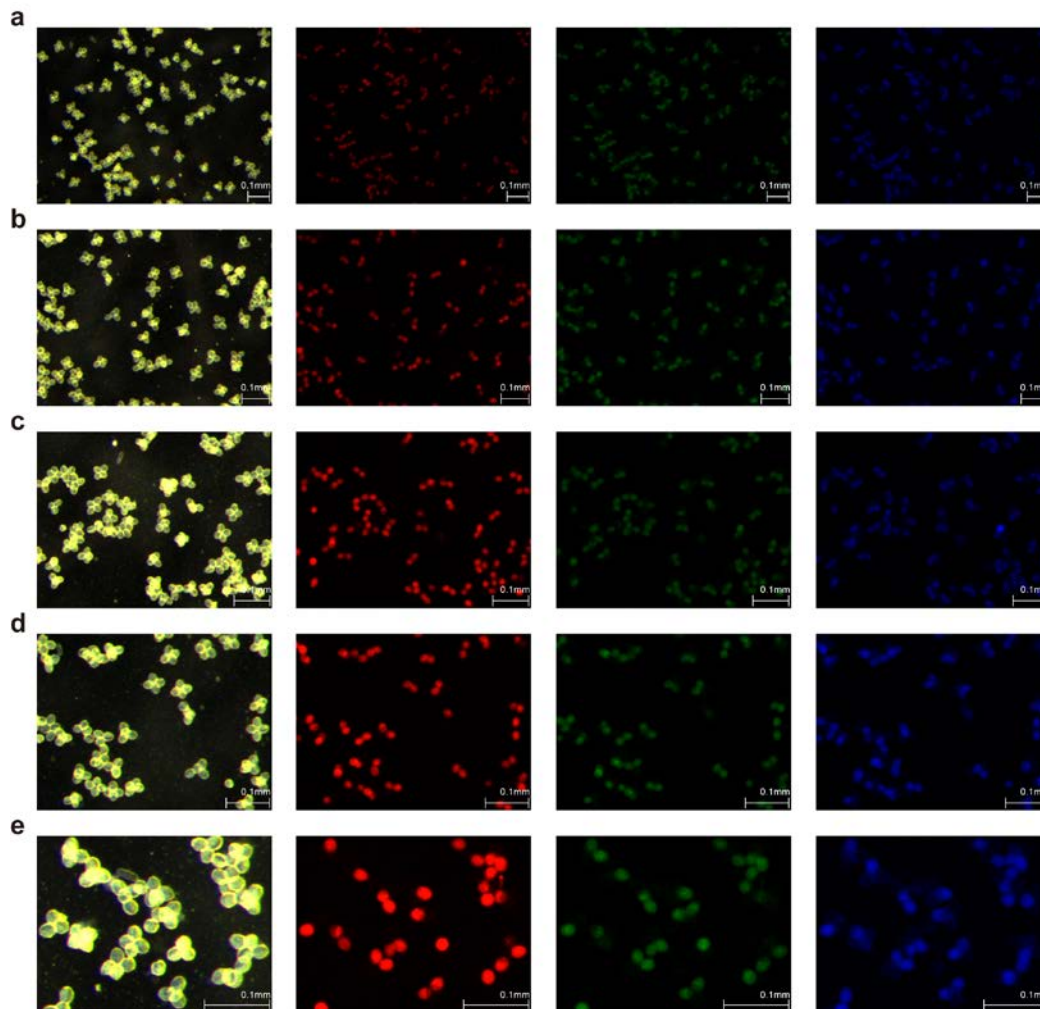

398

399 **Supplementary Fig. 6. Different sized tetrad images.**

400 Tetrad images were taken using an epifluorescence microscope at different magnifications (**a–**  
401 **e**) (25x, 32x, 40x, 50x, 80x) under bright-field, RFP, YPF and CFP filters. Scale bar = 0.1 mm.

402

403 **Supplementary Table 1. Comparison of crossover measurement methods.**

404 DeepTetrad involves the preparation of a large number of tetrads using a quick and simple  
 405 method, and increases the speed of tetrad analysis to obtain data from many individual plants  
 406 by analyzing all tetrad images simultaneously. Abbreviations: CO, crossover; DCO, double  
 407 crossovers.

|                                                                                                 | <b>Tetrad analysis<br/>(manual counting)</b>     | <b>Flow cytometry</b>                             | <b>Tetrad analysis<br/>(DeepTetrad)</b>     |
|-------------------------------------------------------------------------------------------------|--------------------------------------------------|---------------------------------------------------|---------------------------------------------|
| Equipment requirements                                                                          | Fluorescence microscope, graphics software       | Fluorescence microscope, flow cytometer           | Fluorescence microscope, DeepTetrad package |
| Tetrad preparation method                                                                       | Simple                                           | Multiple steps (50-ml tube, flow cytometric tube) | Quick and simple (1.5-ml tube)              |
| Time to prepare tetrads from 10 individual plants                                               | 2 h 30 min (1 h 40 min/sampling, 50 min/imaging) | 1 h (60 min/sampling)                             | 1 h (10 min/sampling, 50 min/imaging)       |
| Time of data analysis for two adjacent intervals in 10 individual plants (~1,000 tetrads/plant) | 30 h                                             | 5 h (30 min/plant, 10 plants)                     | 2 h 30 min (16 min/plant, 10 plants)        |
| Imaging requirement                                                                             | Yes                                              | No                                                | Yes                                         |
| Data analysis                                                                                   | Individually                                     | Individually                                      | Simultaneously                              |
| Gene conversion measurement                                                                     | Yes                                              | No                                                | Yes                                         |
| CO interference measurement                                                                     | Yes                                              | Yes                                               | Yes                                         |
| Single-interval DCO measurement                                                                 | Yes                                              | No                                                | Yes                                         |
| Differentiating 2-strand, 3-strand and 4-strand DCOs from one another                           | Yes                                              | No                                                | Yes                                         |
| <i>qrt1</i> mutant background                                                                   | Yes                                              | No                                                | Yes                                         |

408

409

410 **Supplementary Table 2. Measurement of crossover frequency of FTL intervals by**  
 411 **DeepTetrad, manual counting, flow cytometry, and DeepMonad.**

412 In FTLs with T-DNAs expressing eYFP (Y), dsRed (R) and eCFP (C), the physical distances and genetic  
 413 distances are shown<sup>18</sup>. Genetic distances were measured by DeepTetrad, manual counting, flow  
 414 cytometry<sup>6,19–21,31</sup>, and DeepMonad. The results of statistical analyses (mean of cM, 95% confidence  
 415 interval, *P*-value) on the genetic distances measured by different methods are shown. The *P*-values of  
 416 significantly different crossover frequency are marked by asterisks. A *P*-value is not calculated when  
 417 assumptions for the statistical *t*-test are violated. Abbreviations: DT, DeepTetrad; MC, manual counting;  
 418 FC, flow cytometry; DM, DeepMonad; FTL, fluorescent tagged line.

| FTL genotype                       | T-DNA 1    | T-DNA 2    | T-DNA 3    | Mb   | cM (DT)      | cM (MC)      | cM (FC)      | cM (DM)      | <i>p</i> -value (DT-MC) | <i>p</i> -value (DT-DM) | Total tetrads (DT) |
|------------------------------------|------------|------------|------------|------|--------------|--------------|--------------|--------------|-------------------------|-------------------------|--------------------|
| <i>l1bc (YRC/+++)</i>              | 3,905,441  | 5,755,618  | 9,850,022  |      |              |              |              |              |                         |                         | 18,584             |
| <i>l1b (YR/++)</i>                 | 3,905,441  | 5,755,618  |            | 1.85 | 8.09 ± 0.17  | 8.02 ± 0.59  | 7.93 ± 0.18  | 7.79 ± 0.20  | 7.68E-01                | 1.54E-02*               |                    |
| <i>l1c (RC/++)</i>                 |            | 5,755,618  | 9,850,022  | 4.09 | 19.69 ± 0.37 | 20.00 ± 0.83 | 19.20 ± 0.21 | 18.38 ± 0.32 | 3.97E-01                | 2.02E-05*               |                    |
| <i>l1b-c (YC/++)</i>               | 3,905,441  |            | 9,850,022  | 5.94 | 27.43 ± 0.36 | 27.59 ± 3.10 | 26.12 ± 0.42 | 24.88 ± 0.32 | 9.07E-01                | 5.29E-09*               |                    |
| <i>l1fg (YCR/+++)</i>              | 24,645,163 | 25,652,977 | 25,956,590 |      |              |              |              |              |                         |                         | 14,112             |
| <i>l1f (YC/++)</i>                 | 24,645,163 | 25,652,977 |            | 1.01 | 6.44 ± 0.21  | 5.74 ± 0.5   |              | 6.34 ± 0.26  | 5.61E-02                | 4.78E-01                |                    |
| <i>l1g (CR/++)</i>                 |            | 25,652,977 | 25,956,590 | 0.30 | 1.78 ± 0.11  | 2.26 ± 0.61  |              | 1.77 ± 0.10  | 1.02E-01                | 8.19E-01                |                    |
| <i>l1f-g (YR/++)</i>               | 24,645,163 |            | 25,956,590 | 1.31 | 8.14 ± 0.18  | 7.54 ± 2.5   | 8.16 ± 0.07  | 7.95 ± 0.18  | 1.16E-01                | 1.05E-01                |                    |
| <i>l2fg (RYC/+++)</i>              | 18,286,716 | 18,957,093 | 19,373,634 |      |              |              |              |              |                         |                         | 10,761             |
| <i>l2f (RY/++)</i>                 | 18,286,716 | 18,957,093 |            | 0.67 | 6.83 ± 0.33  | 7.29 ± 1.3   | 7.95 ± 0.58  | 6.79 ± 0.34  | 3.94E-01                | 8.63E-01                |                    |
| <i>l2g (YC/++)</i>                 |            | 18,957,093 | 19,373,634 | 0.42 | 4.50 ± 0.17  | 4.61 ± 0.46  |              | 4.45 ± 0.18  | 6.31E-01                | 6.08E-01                |                    |
| <i>l2f-g (RC/++)</i>               | 18,286,716 |            | 19,373,634 | 1.09 | 11.15 ± 0.28 | 11.5 ± 2.31  |              | 10.93 ± 0.26 | 6.67E-01                | 1.93E-01                |                    |
| <i>l3bc (CYR/+++)</i>              | 498,916    | 3,126,994  | 4,319,513  |      |              |              |              |              |                         |                         | 10,669             |
| <i>l3b (CY/++)</i>                 | 498,916    | 3,126,994  |            | 2.63 | 17.91 ± 0.54 | 17.94 ± 0.71 | 17.43 ± 1.14 | 16.95 ± 0.35 | 9.58E-01                | NA                      |                    |
| <i>l3c (YR/++)</i>                 |            | 3,126,994  | 4,319,513  | 1.19 | 4.53 ± 0.35  | 4.88 ± 0.28  | 5.17 ± 0.14  | 4.44 ± 0.31  | 8.17E-02                | 6.58E-01                |                    |
| <i>l3b-c (CR/++)</i>               | 498,916    |            | 4,319,513  | 3.82 | 22.51 ± 0.64 | 23.61 ± 1.46 | 21.89 ± 1.22 | 20.72 ± 0.53 | 1.44E-01                | 1.65E-04*               |                    |
| <i>l5ab (RYC/+++)</i>              | 18,164,269 | 23,080,567 | 25,731,311 |      |              |              |              |              |                         |                         | 7,772              |
| <i>l5a (RY/++)</i>                 | 18,164,269 | 23,080,567 |            | 4.92 | 22.24 ± 0.49 | 21.86 ± 1.36 | 22.70 ± 1.77 | 20.73 ± 0.27 | 5.32E-01                | 7.28E-05*               |                    |
| <i>l5b (YC/++)</i>                 |            | 23,080,567 | 25,731,311 | 2.65 | 13.31 ± 0.31 | 12.36 ± 1.28 |              | 12.81 ± 0.42 | 1.62E-01                | 2.68E-02*               |                    |
| <i>l5a-b (RC/++)</i>               | 18,164,269 |            | 25,731,311 | 7.57 | 34.91 ± 0.38 | 34.21 ± 2.41 |              | 31.03 ± 0.50 | 5.05E-01                | 1.35E-07*               |                    |
| <i>CEN3 (RY/++)</i>                | 11,115,724 | 16,520,560 |            | 5.40 | 11.96 ± 0.64 | 12.72 ± 0.86 | 11.17 ± 0.19 | 11.45 ± 0.70 | 1.16E-01                | 1.95E-01                | 7,657              |
| <i>l2ab recq4ab figl (CYR/+++)</i> | 12,640,092 | 13,226,013 | 14,675,407 |      |              |              |              |              |                         |                         | 4,271              |
| <i>l2a recq4ab figl (CY/++)</i>    | 12,640,092 | 13,226,013 |            | 0.59 | 8.86 ± 1.38  |              |              | 8.35 ± 1.56  | NA                      | NA                      |                    |
| <i>l2b recq4ab figl (YR/++)</i>    |            | 13,226,013 | 14,675,407 | 1.45 | 27.47 ± 1.88 |              |              | 21.42 ± 0.48 | NA                      | NA                      |                    |
| <i>l2a-b recq4ab figl (CR/++)</i>  | 12,640,092 |            | 14,675,407 | 2.04 | 35.26 ± 2.56 |              |              | 25.99 ± 0.83 | NA                      | NA                      |                    |

419

420

421 **Supplementary Table 3. Measurements of crossover frequency and interference in FTL**  
 422 **intervals by DeepTetrad.**

423 Abbreviations: CO, crossover; non-crossover, NCO; single crossover, SCO; double crossover, DCO; st\*, stand; NPD, non-  
 424 parental diatype;  $\sigma$ , interference ratio.  $\sigma = X_{if}(\text{with adjacent CO}) / X_{if}(\text{w/o adjacent CO})$ .  $X_{if}$  is the map distance of the first interval  
 425 ( $i1$ ) generated from the Perkins equation  $((1/2 \cdot T) + 3 \cdot (\text{NPD}) / \text{total})$ . A  $\sigma$  value of 1 indicates no interference. The letters A-L  
 426 represent tetrad classification as described previously<sup>18</sup>.

| FTL                   | A<br>NCO | B<br>SCO- $i1$ | C<br>SCO- $i2$ | D<br>2st*<br>DCO | E<br>3st*<br>DCOa | F<br>3st*<br>DCOb | G<br>4st*<br>DCO | H<br>NPD- $i1$<br>NCO- $i2$ | I<br>NCO- $i1$<br>NPD- $i2$ | J<br>NPD- $i1$<br>SCO- $i2$ | K<br>SCO- $i1$<br>NPD- $i2$ | L<br>NPD- $i1$<br>NPD- $i2$ | Total | Interval 1<br>(cM) | Interval 2<br>(cM) | Interval 3<br>(cM) | $X_{if}$<br>(w/o<br>adjacent<br>CO) | $X_{if}$<br>(with<br>adjacent<br>CO) | $\sigma$ |
|-----------------------|----------|----------------|----------------|------------------|-------------------|-------------------|------------------|-----------------------------|-----------------------------|-----------------------------|-----------------------------|-----------------------------|-------|--------------------|--------------------|--------------------|-------------------------------------|--------------------------------------|----------|
| 11bc                  | 1490     | 370            | 898            | 26               | 13                | 18                | 21               | 1                           | 15                          | 1                           | 3                           | 0                           | 2856  | 8.11               | 19.00              | 26.70              | 0.10                                | 0.04                                 | 0.43     |
| 11bc                  | 1396     | 364            | 907            | 12               | 14                | 15                | 11               | 5                           | 15                          | 0                           | 2                           | 0                           | 2741  | 8.17               | 19.35              | 27.14              | 0.11                                | 0.03                                 | 0.25     |
| 11bc                  | 1346     | 324            | 861            | 18               | 14                | 15                | 20               | 3                           | 16                          | 0                           | 1                           | 0                           | 2618  | 7.83               | 19.67              | 27.67              | 0.10                                | 0.04                                 | 0.35     |
| 11bc                  | 642      | 152            | 427            | 8                | 5                 | 7                 | 8                | 2                           | 5                           | 1                           | 0                           | 0                           | 1257  | 7.88               | 19.33              | 27.13              | 0.10                                | 0.04                                 | 0.36     |
| 11bc                  | 1084     | 283            | 691            | 14               | 8                 | 14                | 10               | 5                           | 16                          | 0                           | 3                           | 0                           | 2128  | 8.51               | 20.00              | 27.84              | 0.11                                | 0.03                                 | 0.28     |
| 11bc                  | 789      | 215            | 512            | 8                | 10                | 8                 | 6                | 0                           | 15                          | 1                           | 0                           | 0                           | 1564  | 8.09               | 20.30              | 27.88              | 0.11                                | 0.03                                 | 0.32     |
| 11bc                  | 1253     | 304            | 862            | 21               | 10                | 18                | 12               | 7                           | 14                          | 0                           | 0                           | 0                           | 2501  | 8.14               | 20.13              | 27.83              | 0.11                                | 0.03                                 | 0.29     |
| 11bc                  | 1457     | 385            | 986            | 16               | 23                | 20                | 16               | 1                           | 12                          | 0                           | 3                           | 0                           | 2919  | 8.03               | 19.72              | 27.25              | 0.11                                | 0.04                                 | 0.34     |
| total                 | 9457     | 2397           | 6144           | 123              | 97                | 115               | 104              | 24                          | 108                         | 3                           | 12                          | 0                           | 18584 | 8.10               | 19.66              | 27.40              | 0.11                                | 0.03                                 | 0.33     |
| 11fg                  | 1432     | 192            | 58             | 1                | 0                 | 0                 | 1                | 2                           | 0                           | 0                           | 1                           | 0                           | 1687  | 6.14               | 1.96               | 7.97               | 0.06                                | 0.02                                 | 0.39     |
| 11fg                  | 824      | 133            | 29             | 1                | 0                 | 1                 | 1                | 0                           | 0                           | 0                           | 0                           | 0                           | 989   | 6.88               | 1.62               | 8.54               | 0.07                                | 0.05                                 | 0.67     |
| 11fg                  | 1640     | 227            | 71             | 2                | 0                 | 0                 | 1                | 2                           | 0                           | 0                           | 0                           | 0                           | 1943  | 6.23               | 1.90               | 8.13               | 0.06                                | 0.02                                 | 0.32     |
| 11fg                  | 2029     | 295            | 87             | 4                | 0                 | 0                 | 0                | 2                           | 0                           | 0                           | 0                           | 0                           | 2417  | 6.43               | 1.88               | 8.15               | 0.07                                | 0.02                                 | 0.33     |
| 11fg                  | 1726     | 251            | 69             | 2                | 1                 | 0                 | 0                | 0                           | 0                           | 0                           | 0                           | 0                           | 2049  | 6.20               | 1.76               | 7.83               | 0.06                                | 0.02                                 | 0.33     |
| 11fg                  | 1584     | 236            | 68             | 1                | 0                 | 1                 | 0                | 1                           | 0                           | 0                           | 0                           | 0                           | 1891  | 6.45               | 1.85               | 8.22               | 0.07                                | 0.01                                 | 0.21     |
| 11fg                  | 1365     | 203            | 47             | 4                | 0                 | 1                 | 2                | 1                           | 0                           | 0                           | 0                           | 0                           | 1623  | 6.65               | 1.66               | 8.29               | 0.07                                | 0.06                                 | 0.97     |
| 11fg                  | 1269     | 195            | 45             | 2                | 1                 | 1                 | 0                | 0                           | 0                           | 0                           | 0                           | 0                           | 1513  | 6.58               | 1.62               | 8.00               | 0.07                                | 0.04                                 | 0.61     |
| total                 | 11869    | 1732           | 474            | 17               | 2                 | 4                 | 5                | 8                           | 0                           | 0                           | 1                           | 0                           | 14112 | 6.41               | 1.80               | 8.12               | 0.07                                | 0.03                                 | 0.44     |
| 12ab<br>recq4<br>fig1 | 559      | 85             | 330            | 13               | 20                | 16                | 21               | 3                           | 23                          | 0                           | 7                           | 0                           | 1077  | 8.36               | 26.93              | 34.35              | 0.08                                | 0.09                                 | 1.12     |
|                       | 720      | 142            | 402            | 31               | 14                | 26                | 29               | 2                           | 42                          | 1                           | 8                           | 0                           | 1417  | 9.46               | 28.33              | 36.38              | 0.09                                | 0.10                                 | 1.16     |
|                       | 900      | 156            | 549            | 22               | 32                | 33                | 33               | 2                           | 43                          | 3                           | 6                           | 0                           | 1779  | 8.77               | 27.15              | 35.05              | 0.08                                | 0.10                                 | 1.26     |
| total                 | 1279     | 227            | 732            | 44               | 34                | 42                | 50               | 5                           | 65                          | 1                           | 15                          | 0                           | 2494  | 8.98               | 27.73              | 35.51              | 0.09                                | 0.10                                 | 1.14     |
| 12fg                  | 1036     | 158            | 112            | 3                | 0                 | 1                 | 0                | 0                           | 1                           | 0                           | 0                           | 0                           | 1311  | 6.18               | 4.65               | 10.56              | 0.07                                | 0.02                                 | 0.26     |
| 12fg                  | 1068     | 178            | 124            | 3                | 0                 | 1                 | 1                | 0                           | 0                           | 0                           | 0                           | 0                           | 1375  | 6.65               | 4.69               | 11.24              | 0.07                                | 0.02                                 | 0.27     |
| 12fg                  | 798      | 126            | 87             | 2                | 1                 | 1                 | 1                | 1                           | 0                           | 0                           | 0                           | 0                           | 1017  | 6.74               | 4.52               | 11.16              | 0.07                                | 0.03                                 | 0.38     |
| 12fg                  | 1115     | 207            | 117            | 5                | 4                 | 2                 | 0                | 0                           | 0                           | 0                           | 0                           | 0                           | 1450  | 7.52               | 4.41               | 11.38              | 0.08                                | 0.04                                 | 0.55     |
| 12fg                  | 1746     | 294            | 197            | 3                | 0                 | 0                 | 4                | 1                           | 1                           | 0                           | 0                           | 0                           | 2246  | 6.83               | 4.67               | 11.73              | 0.07                                | 0.02                                 | 0.23     |
| 12fg                  | 797      | 143            | 77             | 3                | 1                 | 1                 | 0                | 0                           | 1                           | 0                           | 0                           | 0                           | 1023  | 7.23               | 4.30               | 11.14              | 0.08                                | 0.03                                 | 0.40     |
| 12fg                  | 798      | 133            | 80             | 1                | 1                 | 1                 | 1                | 0                           | 0                           | 0                           | 0                           | 0                           | 1015  | 6.75               | 4.14               | 10.89              | 0.07                                | 0.02                                 | 0.33     |
| 12fg                  | 1031     | 171            | 115            | 4                | 2                 | 0                 | 1                | 0                           | 0                           | 0                           | 0                           | 0                           | 1324  | 6.72               | 4.61               | 11.10              | 0.07                                | 0.03                                 | 0.40     |
| total                 | 8389     | 1410           | 909            | 24               | 9                 | 7                 | 8                | 2                           | 3                           | 0                           | 0                           | 0                           | 10761 | 6.83               | 4.53               | 11.21              | 0.07                                | 0.03                                 | 0.34     |
| 13bc                  | 657      | 368            | 96             | 3                | 6                 | 2                 | 8                | 4                           | 0                           | 0                           | 0                           | 0                           | 1144  | 17.96              | 5.03               | 23.78              | 0.19                                | 0.08                                 | 0.43     |
| 13bc                  | 500      | 270            | 53             | 7                | 1                 | 1                 | 5                | 3                           | 0                           | 0                           | 0                           | 0                           | 840   | 17.98              | 3.99               | 22.20              | 0.19                                | 0.10                                 | 0.56     |
| 13bc                  | 1128     | 615            | 152            | 4                | 9                 | 8                 | 5                | 13                          | 1                           | 0                           | 0                           | 0                           | 1935  | 18.58              | 4.75               | 23.20              | 0.20                                | 0.07                                 | 0.37     |
| 13bc                  | 1035     | 523            | 131            | 4                | 3                 | 3                 | 5                | 7                           | 2                           | 0                           | 0                           | 0                           | 1713  | 16.93              | 4.61               | 21.72              | 0.18                                | 0.05                                 | 0.28     |
| 13bc                  | 572      | 292            | 65             | 1                | 2                 | 4                 | 4                | 8                           | 0                           | 0                           | 0                           | 0                           | 948   | 18.51              | 4.01               | 22.94              | 0.19                                | 0.07                                 | 0.37     |
| 13bc                  | 958      | 510            | 123            | 5                | 2                 | 3                 | 8                | 4                           | 1                           | 0                           | 0                           | 0                           | 1614  | 17.10              | 4.55               | 22.18              | 0.18                                | 0.06                                 | 0.35     |
| 13bc                  | 505      | 264            | 57             | 7                | 1                 | 5                 | 1                | 5                           | 0                           | 1                           | 0                           | 0                           | 846   | 18.56              | 4.26               | 21.51              | 0.19                                | 0.14                                 | 0.73     |
| 13bc                  | 937      | 535            | 134            | 3                | 4                 | 6                 | 4                | 3                           | 2                           | 1                           | 0                           | 0                           | 1629  | 17.68              | 5.03               | 22.53              | 0.19                                | 0.07                                 | 0.40     |
| total                 | 6292     | 3377           | 811            | 34               | 28                | 32                | 40               | 47                          | 6                           | 2                           | 0                           | 0                           | 10669 | 17.83              | 4.61               | 22.53              | 0.19                                | 0.08                                 | 0.41     |
| 15ab                  | 637      | 585            | 315            | 18               | 18                | 26                | 20               | 9                           | 4                           | 0                           | 1                           | 0                           | 1633  | 22.11              | 13.07              | 35.00              | 0.26                                | 0.10                                 | 0.40     |
| 15ab                  | 696      | 668            | 409            | 19               | 17                | 14                | 11               | 13                          | 4                           | 4                           | 1                           | 0                           | 1856  | 22.41              | 13.58              | 34.51              | 0.27                                | 0.09                                 | 0.33     |
| 15ab                  | 563      | 504            | 304            | 14               | 13                | 18                | 11               | 15                          | 2                           | 1                           | 2                           | 0                           | 1447  | 22.74              | 13.30              | 34.90              | 0.27                                | 0.09                                 | 0.32     |
| 15ab                  | 508      | 461            | 270            | 15               | 27                | 12                | 20               | 6                           | 1                           | 3                           | 1                           | 0                           | 1324  | 22.28              | 13.56              | 35.35              | 0.25                                | 0.13                                 | 0.52     |
| 15ab                  | 602      | 527            | 292            | 23               | 13                | 21                | 22               | 8                           | 3                           | 0                           | 1                           | 0                           | 1512  | 21.66              | 13.06              | 34.79              | 0.25                                | 0.11                                 | 0.42     |
| total                 | 3006     | 2745           | 1590           | 89               | 88                | 91                | 84               | 51                          | 14                          | 8                           | 6                           | 0                           | 7772  | 22.24              | 13.32              | 34.88              | 0.26                                | 0.10                                 | 0.39     |

427 **Supplementary Table 4. Measurements of crossover frequency in FTL intervals by**  
 428 **manually counting tetrads.**

429 Abbreviations: NPD, non-parental ditype; T, tetra type; FTL, fluorescence tagged line.

| FTL Interval | NPD | T   | Total | cM    | FTL Interval | NPD | T   | Total | cM    |
|--------------|-----|-----|-------|-------|--------------|-----|-----|-------|-------|
| CEN3         | 1   | 163 | 670   | 12.61 | l2g          | 0   | 11  | 153   | 3.59  |
| CEN3         | 0   | 134 | 517   | 12.96 | l2g          | 0   | 9   | 114   | 3.95  |
| CEN3         | 0   | 164 | 623   | 13.16 | l2g          | 0   | 6   | 77    | 3.90  |
| CEN3         | 2   | 124 | 528   | 12.88 | l2g          | 0   | 15  | 169   | 4.44  |
| CEN3         | 2   | 155 | 593   | 14.08 | l2g          | 0   | 9   | 119   | 3.78  |
| CEN3         | 0   | 124 | 563   | 11.01 | l2g          | 0   | 10  | 99    | 5.05  |
| CEN3         | 2   | 150 | 656   | 12.35 | l2g          | 0   | 22  | 205   | 5.37  |
| l1b          | 0   | 151 | 998   | 7.57  | l2f-g        | 0   | 119 | 547   | 10.88 |
| l1b          | 0   | 112 | 764   | 7.33  | l2f-g        | 1   | 88  | 363   | 12.95 |
| l1b          | 0   | 119 | 737   | 8.07  | l2f-g        | 2   | 126 | 556   | 12.41 |
| l1b          | 0   | 118 | 692   | 8.53  | l2f-g        | 0   | 65  | 333   | 9.76  |
| l1b          | 0   | 35  | 224   | 7.81  | l3b          | 1   | 190 | 542   | 18.08 |
| l1b          | 0   | 118 | 670   | 8.81  | l3b          | 2   | 126 | 380   | 18.16 |
| l1c          | 3   | 347 | 998   | 18.29 | l3b          | 4   | 230 | 694   | 18.30 |
| l1c          | 2   | 234 | 618   | 19.90 | l3b          | 4   | 64  | 228   | 19.30 |
| l1c          | 8   | 261 | 737   | 20.96 | l3b          | 9   | 273 | 784   | 20.85 |
| l1c          | 4   | 258 | 710   | 19.86 | l3b          | 0   | 59  | 193   | 15.28 |
| l1c          | 9   | 180 | 577   | 20.28 | l3b          | 1   | 68  | 219   | 16.89 |
| l1c          | 6   | 182 | 521   | 20.92 | l3b          | 2   | 99  | 296   | 18.75 |
| l1c          | 4   | 174 | 500   | 19.80 | l3b          | 4   | 167 | 559   | 17.08 |
| l1b-c        | 6   | 472 | 998   | 25.45 | l3b          | 2   | 134 | 381   | 19.16 |
| l1b-c        | 4   | 435 | 764   | 30.04 | l3b          | 1   | 65  | 207   | 17.15 |
| l1b-c        | 10  | 352 | 737   | 27.95 | l3b          | 0   | 59  | 184   | 16.03 |
| l1b-c        | 4   | 387 | 674   | 30.49 | l3b          | 1   | 67  | 196   | 18.62 |
| l1b-c        | 2   | 120 | 213   | 30.99 | l3b          | 0   | 110 | 311   | 17.68 |
| l1b-c        | 2   | 45  | 132   | 21.59 | l3b          | 2   | 126 | 391   | 17.65 |
| l1b-c        | 0   | 25  | 47    | 26.60 | l3b          | 2   | 166 | 494   | 18.02 |
| l1f          | 0   | 56  | 536   | 5.22  | l3c          | 1   | 22  | 276   | 5.07  |
| l1f          | 0   | 56  | 494   | 5.67  | l3c          | 0   | 20  | 219   | 4.57  |
| l1f          | 0   | 35  | 292   | 5.99  | l3c          | 0   | 31  | 296   | 5.24  |
| l1f          | 1   | 70  | 589   | 6.45  | l3c          | 1   | 50  | 559   | 5.01  |
| l1f          | 0   | 61  | 607   | 5.02  | l3c          | 0   | 34  | 381   | 4.46  |
| l1f          | 18  | 1   | 169   | 7.10  | l3c          | 0   | 18  | 184   | 4.89  |
| l1f          | 29  | 0   | 222   | 6.53  | l3c          | 0   | 21  | 196   | 5.36  |
| l1f          | 23  | 0   | 198   | 5.81  | l3c          | 0   | 29  | 311   | 4.66  |
| l1f          | 0   | 16  | 129   | 6.20  | l3c          | 0   | 33  | 391   | 4.22  |
| l1f          | 0   | 22  | 199   | 5.53  | l3c          | 0   | 53  | 494   | 5.36  |
| l1f          | 0   | 17  | 152   | 5.59  | l3b-c        | 5   | 92  | 233   | 26.18 |
| l1f          | 0   | 18  | 188   | 4.79  | l3b-c        | 3   | 91  | 219   | 24.89 |
| l1f          | 0   | 21  | 196   | 5.36  | l3b-c        | 4   | 122 | 296   | 24.66 |
| l1f          | 0   | 22  | 155   | 7.10  | l3b-c        | 6   | 208 | 559   | 21.82 |
| l1f          | 0   | 12  | 99    | 6.06  | l3b-c        | 6   | 162 | 381   | 25.98 |
| l1f          | 0   | 15  | 122   | 6.15  | l3b-c        | 0   | 74  | 184   | 20.11 |
| l1f          | 0   | 7   | 118   | 2.97  | l3b-c        | 2   | 85  | 196   | 24.74 |
| l1g          | 0   | 17  | 645   | 1.32  | l3b-c        | 2   | 135 | 311   | 23.63 |
| l1g          | 0   | 22  | 532   | 2.07  | l3b-c        | 4   | 143 | 391   | 21.36 |
| l1g          | 0   | 17  | 294   | 2.89  | l3b-c        | 4   | 200 | 494   | 22.67 |
| l1g          | 1   | 36  | 739   | 2.84  | l5a          | 2   | 266 | 608   | 22.86 |
| l1g          | 0   | 31  | 665   | 2.33  | l5a          | 6   | 208 | 513   | 23.78 |
| l1g          | 0   | 21  | 500   | 2.10  | l5a          | 2   | 48  | 139   | 21.58 |
| l1f-g        | 0   | 70  | 544   | 6.43  | l5a          | 1   | 34  | 99    | 20.20 |
| l1f-g        | 0   | 74  | 475   | 7.79  | l5a          | 1   | 53  | 140   | 21.07 |
| l1f-g        | 0   | 43  | 256   | 8.40  | l5b          | 0   | 168 | 608   | 13.82 |
| l2f          | 0   | 68  | 532   | 6.39  | l5b          | 0   | 102 | 407   | 12.53 |
| l2f          | 0   | 53  | 363   | 7.30  | l5b          | 0   | 119 | 442   | 13.46 |
| l2f          | 1   | 82  | 556   | 7.91  | l5b          | 0   | 107 | 493   | 10.85 |
| l2f          | 0   | 41  | 333   | 6.16  | l5b          | 1   | 30  | 136   | 13.24 |
| l2f          | 0   | 91  | 525   | 8.67  | l5b          | 0   | 20  | 99    | 10.10 |
| l2g          | 0   | 47  | 480   | 4.90  | l5b          | 1   | 29  | 140   | 12.50 |
| l2g          | 0   | 46  | 363   | 6.34  | l5a-b        | 9   | 369 | 608   | 34.79 |
| l2g          | 0   | 50  | 556   | 4.50  | l5a-b        | 18  | 304 | 605   | 34.05 |
| l2g          | 0   | 23  | 334   | 3.44  | l5a-b        | 11  | 281 | 476   | 36.45 |
| l2g          | 0   | 59  | 536   | 5.50  | l5a-b        | 8   | 280 | 493   | 33.27 |
| l2g          | 0   | 71  | 639   | 5.56  | l5a-b        | 2   | 90  | 134   | 38.06 |
| l2g          | 0   | 12  | 126   | 4.76  | l5a-b        | 1   | 59  | 99    | 32.83 |
| l2g          | 0   | 6   | 73    | 4.11  | l5a-b        | 1   | 78  | 140   | 30.00 |

430

431 **Supplementary Table 5. Measurements of crossover interference in FTL-*l1bc* by**  
 432 **manually counting tetrads.**

433 Abbreviations: CO, crossover; non-crossover, NCO; single crossover, SCO; double crossover,  
 434 DCO; st\*, stand; NPD, non-parental ditype;  $\sigma$ , interference ratio.  $\sigma = X_{i1}$  (with adjacent CO) /  $X_{i1}$   
 435 (w/o adjacent CO).  $X_{i1}$  is the map distance of the first interval (*i1*) generated from the Perkins  
 436 equation  $((1/2 * T) + 3 * (NPD) / \text{total})$ . A  $\sigma$  value of 1 indicates no interference. The letters A-L  
 437 represent tetrad classification as described previously<sup>18</sup>.

| FTL         | A<br>NCO | B<br>SCO- <i>i1</i> | C<br>SCO- <i>i2</i> | D<br>2st*<br>DCO | E<br>3st*<br>DCOa | F<br>3st*<br>DCOb | G<br>4st*<br>DCO | H<br>NPD- <i>i1</i><br>NCO- <i>i2</i> | I<br>NCO- <i>i1</i><br>NPD- <i>i2</i> | J<br>NPD- <i>i1</i><br>SCO- <i>i2</i> | K<br>SCO- <i>i1</i><br>NPD- <i>i2</i> | L<br>NPD- <i>i1</i><br>NPD- <i>i2</i> | Total | Interval 1<br>(cM) | Interval 2<br>(cM) | Interval 3<br>(cM) | $X_{i1}$ (w/o<br>adjacent<br>CO) | $X_{i1}$ (with<br>adjacent<br>CO) | $\sigma$ |
|-------------|----------|---------------------|---------------------|------------------|-------------------|-------------------|------------------|---------------------------------------|---------------------------------------|---------------------------------------|---------------------------------------|---------------------------------------|-------|--------------------|--------------------|--------------------|----------------------------------|-----------------------------------|----------|
| <i>l1bc</i> | 514      | 110                 | 277                 | 7                | 4                 | 4                 | 4                | 0                                     | 3                                     | 0                                     | 0                                     | 0                                     | 923   | 6.99               | 17.01              | 23.67              | 0.09                             | 0.03                              | 0.36     |

438



439 **Supplementary Table 6. Information of imaging fluorescent pollen in *FTLs*.**

440 The gain, saturation, gamma values except for the exposure value are applied across images:  
441 gain of x10.1, saturation of 1.00, gamma of 1.50. In particular, exposure for the YFP image  
442 should be adjusted if its fluorescence is weaker than those in the other channels. The table  
443 shows the value of exposure applied to each FTL (fluorescent tagged line).

| FTL                   | Red (ms) | Yellow (ms) | Cyan (ms) |
|-----------------------|----------|-------------|-----------|
| <i>l1bc (YRC/+++)</i> | 250      | 1,200       | 1,200     |
| <i>l1fg (YCR/+++)</i> | 300      | 800         | 800       |
| <i>l2ab (CYR/+++)</i> | 150      | 700         | 1,500     |
| <i>l2fg (RYC/+++)</i> | 40       | 1500        | 700       |
| <i>l3bc(CYR/+++)</i>  | 300      | 1300        | 800       |
| <i>CEN3 (YR/++)</i>   | 700      | 1500        |           |
| <i>l5ab (RYC/+++)</i> | 500      | 1,500       | 1500      |

444

445

446 **References**

- 447 1. Hunter, N. Meiotic Recombination: The Essence of Heredity. *Cold Spring Harb.*  
448 *Perspect. Biol.* **7**, a016618 (2015).
- 449 2. Mercier, R., Mézard, C., Jenczewski, E., Macaisne, N. & Grelon, M. The Molecular  
450 Biology of Meiosis in Plants. *Annu. Rev. Plant Biol.* **66**, 297–327 (2015).
- 451 3. Wang, Y. & Copenhaver, G. P. Meiotic Recombination: Mixing It Up in Plants. *Annu.*  
452 *Rev. Plant Biol.* **69**, 577–609 (2018).
- 453 4. Vrielynck, N. *et al.* A DNA topoisomerase VI-like complex initiates meiotic  
454 recombination. *Science* **351**, 939–43 (2016).
- 455 5. Choi, K. & Henderson, I. R. Meiotic recombination hotspots - A comparative view.  
456 *Plant J.* **83**, (2015).
- 457 6. Choi, K. *et al.* Nucleosomes and DNA methylation shape meiotic DSB frequency in  
458 *Arabidopsis thaliana* transposons and gene regulatory regions. *Genome Res.* **28**,  
459 (2018).
- 460 7. Choi, K. *et al.* *Arabidopsis* meiotic crossover hot spots overlap with H2A.Z  
461 nucleosomes at gene promoters. *Nat. Genet.* **45**, (2013).
- 462 8. Mercier, R. *et al.* Two meiotic crossover classes cohabit in *Arabidopsis*: one is  
463 dependent on MER3, whereas the other one is not. *Curr. Biol.* **15**, 692–701 (2005).
- 464 9. Higgins, J. D., Armstrong, S. J., Franklin, F. C. H. & Jones, G. H. The *Arabidopsis*  
465 MutS homolog AtMSH4 functions at an early step in recombination: evidence for two  
466 classes of recombination in *Arabidopsis*. *Genes Dev.* **18**, 2557–70 (2004).
- 467 10. Berchowitz, L. E., Francis, K. E., Bey, A. L. & Copenhaver, G. P. The role of AtMUS81  
468 in interference-insensitive crossovers in *A. thaliana*. *PLoS Genet.* **3**, e132 (2007).
- 469 11. Serra, H. *et al.* Massive crossover elevation via combination of HEI10 and recq4a  
470 recq4b during *Arabidopsis* meiosis. *Proc. Natl. Acad. Sci. U. S. A.* **115**, 2437–2442  
471 (2018).
- 472 12. Fernandes, J. B., Séguéla-Arnaud, M., Larchevêque, C., Lloyd, A. H. & Mercier, R.  
473 Unleashing meiotic crossovers in hybrid plants. *Proc. Natl. Acad. Sci. U. S. A.* **115**,  
474 2431–2436 (2018).

- 475 13. Choi, K. Advances towards Controlling Meiotic Recombination for Plant Breeding.  
476 *Mol. Cells* **40**, (2017).
- 477 14. Crismani, W. *et al.* FANCM limits meiotic crossovers. *Science* **336**, 1588–90 (2012).
- 478 15. Girard, C. *et al.* AAA-ATPase FIDGETIN-LIKE 1 and Helicase FANCM Antagonize  
479 Meiotic Crossovers by Distinct Mechanisms. *PLoS Genet.* **11**, e1005369 (2015).
- 480 16. Mieulet, D. *et al.* Unleashing meiotic crossovers in crops. *Nat. Plants* **4**, 1010–1016  
481 (2018).
- 482 17. Francis, K. E. *et al.* Pollen tetrad-based visual assay for meiotic recombination in  
483 *Arabidopsis*. *Proc. Natl. Acad. Sci. U. S. A.* **104**, 3913–8 (2007).
- 484 18. Berchowitz, L. E. & Copenhaver, G. P. Fluorescent *Arabidopsis* tetrads: a visual  
485 assay for quickly developing large crossover and crossover interference data sets.  
486 *Nat. Protoc.* **3**, 41–50 (2008).
- 487 19. Yelina, N. E. *et al.* High-throughput analysis of meiotic crossover frequency and  
488 interference via flow cytometry of fluorescent pollen in *Arabidopsis thaliana*. *Nat.*  
489 *Protoc.* **8**, 2119–2134 (2013).
- 490 20. Ziolkowski, P. A. *et al.* Juxtaposition of heterozygosity and homozygosity during  
491 meiosis causes reciprocal crossover remodeling via interference. *Elife* **4**, e03708  
492 (2015).
- 493 21. Ziolkowski, P. A. *et al.* Natural variation and dosage of the HEI10 meiotic E3 ligase  
494 control *Arabidopsis* crossover recombination. *Genes Dev.* **31**, 306–317 (2017).
- 495 22. He, K., Zhang, X., Ren, S. & Sun, J. Deep Residual Learning for Image Recognition.  
496 *ArXiv* 1512.03385 (2015).
- 497 23. He, K., Gkioxari, G., Dollár, P. & Girshick, R. Mask R-CNN. *ArXiv* 1703.06870 (2017).
- 498 24. Lin, T.-Y. *et al.* Feature Pyramid Networks for Object Detection. *ArXiv* 1612.03144  
499 (2016).
- 500 25. Abadi, M. *et al.* TensorFlow: A system for large-scale machine learning. in *Operating*  
501 *Systems Design and Implementation* 265–283 (2016).
- 502 26. Chollet, F. keras. *GitHub* (2015).

- 503 27. Giraut, L. *et al.* Genome-wide crossover distribution in *Arabidopsis thaliana* meiosis  
504 reveals sex-specific patterns along chromosomes. *PLoS Genet.* **7**, (2011).
- 505 28. Girshick, R. Fast R-CNN. *ArXiv* 1504.08083 (2015).
- 506 29. Lin, T.-Y. *et al.* Microsoft COCO: Common Objects in Context. *ArXiv* 1405.0312v3  
507 (2015).
- 508 30. Dutta, A. & Zisserman, A. The VGG Image Annotator (VIA). *ArXiv* 1904.10699v1  
509 (2019).
- 510 31. Yelina, N. E. *et al.* DNA methylation epigenetically silences crossover hot spots and  
511 controls chromosomal domains of meiotic recombination in *Arabidopsis*. *Genes Dev.*  
512 **29**, 2183–202 (2015).
- 513
